# Supplementary material for: Hollow N-doped carbon nanofibers provide superior potassium-storage performance
Source: Royal Society of Chemistry journal article supplement (doi:10.1039/d0na00585a), 2020-01-01
Supplement: d0na00585a1.pdf [file d0na00585a1.pdf]

*Supporting Information for*

**Hollow N-doped carbon nanofibers bring superior potassium-storage  
performance**

Ya Ru Pei, Ming Zhao, Hong Yu Zhou, Chun Cheng Yang\*, Qing Jiang

---

*Key Laboratory of Automobile Materials (Jilin University), Ministry of Education, and School of Materials Science and Engineering, Jilin University, Changchun 130022, China*

\* Corresponding author. Tel.: +86-431-85095371; Fax: +86-431-85095876; E-mail: ccyang@jlu.edu.cn (C. C. Yang).

† Electronic Supplementary Information (ESI) available. See DOI: 10.1039/x0xx00000x

## Supplementary Note

Electrochemical performances of HNCNFs-700 in sodium-ion batteries (SIBs)

Electrochemical measurements

The electrochemical Na-storage performances of HNCNFs-700 were also investigated using coin-type (CR2025) half-cell configurations *vs.* Na metal as the counter electrode, which were assembled in an Ar-filled glove box ( $[O_2] < 1$  ppm,  $[H_2O] < 1$  ppm). The separator was Whatman glass fiber (GF/D) and the electrolyte was the mixture of ethylene carbonate and diethyl carbonate with a volume ratio of 1:1, containing 1 M  $NaClO_4$  and 5 wt% fluoroethylene carbonate. The working electrodes were fabricated by mixing 70 wt% HNCNFs-700, 20 wt% conductive agent (Super P) and 10 wt% binder (Na-CMC) using deionized water as the solvent. The obtained slurry was pasted uniformly on Cu foil and dried in vacuum at 70 °C for 12 h. Then the electrodes were cut into discoidal pieces with a diameter of 12 mm and the mass loading of active materials is 0.4-0.6 mg  $cm^{-2}$ . Galvanostatic charge/discharge cycling tests were performed using a LAND CT2001A battery testing system in the voltage range of 0.01-3 V (*vs.*  $Na^+/Na$ ). Cyclic voltammetry (CV) measurements were carried out on an Ivium-n-Stat electrochemical workstation (Ivium Technologies) with a potential scan rate of 0.1  $mV s^{-1}$  between 0.01-3.0 V (*vs.*  $Na^+/Na$ ).

Electrochemical performances

The electrochemical performances of HNCNFs-700 as an anode in SIBs are shown in Fig. S14. CV curves of the HNCNFs-700 electrodes were measured at a

scan rate of  $0.1 \text{ mV s}^{-1}$  within  $0.01\text{-}3.0 \text{ V}$  (vs.  $\text{Na}^+/\text{Na}$ ) (see Fig. S14a). The broad reduction peak at approximately  $0.5 \text{ V}$  in the first scan, which disappears at the subsequent scans, can be ascribed to the formation of SEI films. The sharp reversible cathodic peak close to  $0.01 \text{ V}$  as well as the wide anodic peak are related to the intercalation and deintercalation of  $\text{Na}^+$  into/from carbon matrix, respectively. During the following cycles, two broad peaks around  $1.2 \text{ V}$  and  $0.8 \text{ V}$  are attributed to the interaction of  $\text{Na}^+$  into species of N atoms. The CV curves from the second cycle to the fifth cycle are well overlapped, which demonstrates an excellent reversibility of the HNCNFs-700 electrode. Fig. S14b shows the galvanostatic charge/discharge voltage profiles of the HNCNFs-700 electrode for the 1<sup>st</sup>, 2<sup>nd</sup>, 50<sup>th</sup>, 100<sup>th</sup> and 200<sup>th</sup> cycles at  $0.1 \text{ A g}^{-1}$ . The initial discharge and charge capacities are  $788.6$  and  $345.4 \text{ mAh g}^{-1}$ , respectively, corresponding to an initial CE of  $43.8\%$ . The HNCNFs-700 electrode delivers a reversible capacity of  $308.3 \text{ mAh g}^{-1}$  after 200 cycles with CE close to  $100\%$  (see Fig. S14c). The HNCNFs-700 electrode also shows superior rate performance with reversible capacities of  $323.7$ ,  $278.6$ ,  $245.9$ ,  $229.8$ ,  $218.2$ ,  $209.6$ ,  $188.3$  and  $169.5 \text{ mAh g}^{-1}$  at  $0.1$ ,  $0.2$ ,  $0.4$ ,  $0.6$ ,  $0.8$ ,  $1$ ,  $2$  and  $5 \text{ A g}^{-1}$ , respectively (see Fig. S14d). When the current density switches back to  $0.1 \text{ A g}^{-1}$ , the HNCNFs-700 electrode recovers a specific capacity of  $300.8 \text{ mAh g}^{-1}$  rapidly and then remains stable for further cycling. Besides, the HNCNFs-700 electrode maintains a high reversible capacity of  $223.2 \text{ mAh g}^{-1}$  at  $1 \text{ A g}^{-1}$  after 5000 cycles with CE close to  $100\%$  (see Fig. S14e). This suggests HNCNFs-700 is also an excellent anode material for SIBs.

The Na-storage behavior of the HNCNFs-700 electrode was also analyzed by CV measurements at different scan rates from 0.2 to 1 mV s<sup>-1</sup> (see Fig. S15a). The calculated *b* values for cathodic and anodic peaks are also both much closer to 1, indicating the Na-storage behavior is dominated by surface capacitive effect. The pseudocapacitive contributions of the HNCNFs-700 electrode at different scan rates are displayed in Fig. S15d.

Supplementary Figures

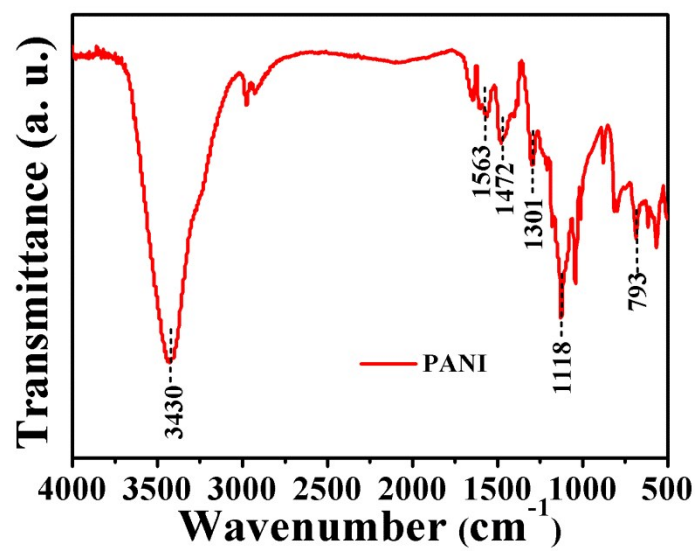

**Fig. S1** FT-IR spectrum of PANI nanofibers.

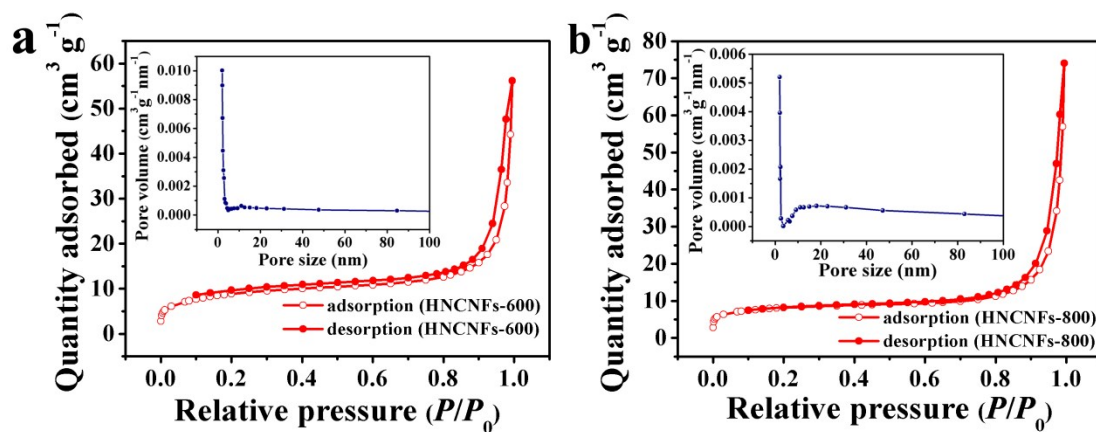

**Fig. S2** N<sub>2</sub> adsorption/desorption isotherms and the corresponding pore size distribution (the inset) of (a) HNCNFs-600 and (b) HNCNFs-800.

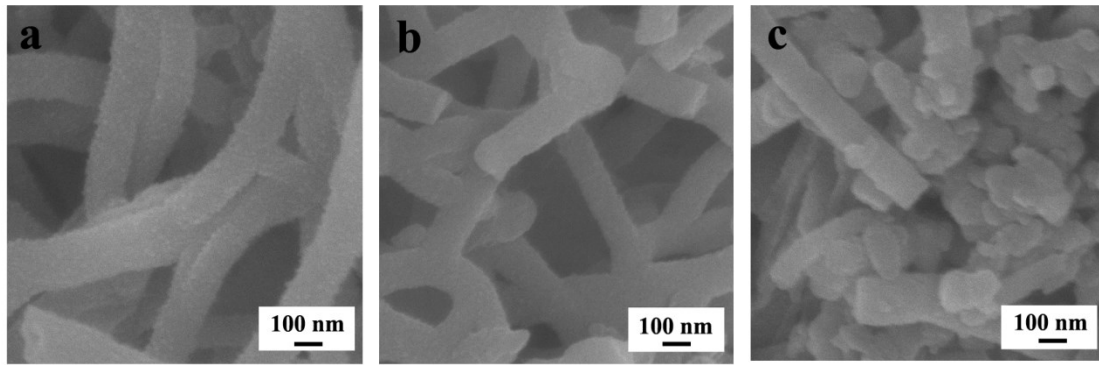

**Fig. S3** SEM images of (a) PANI precursor, (b) HNCNFs-600, and (c) HNCNFs-800.

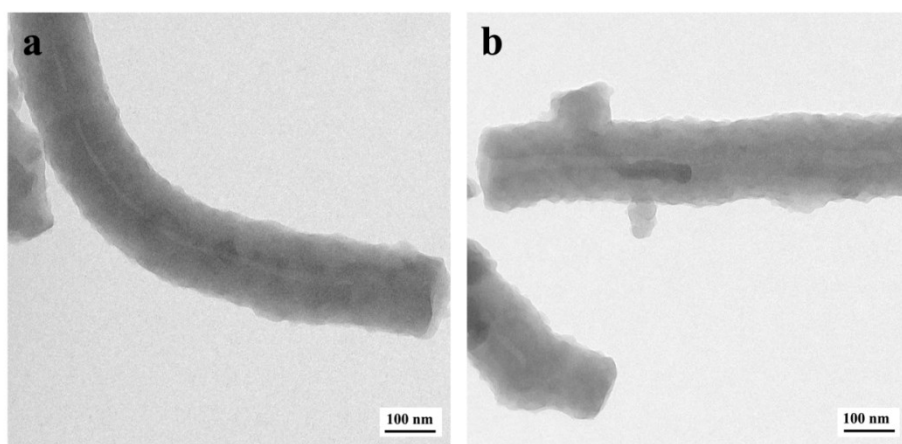

**Fig. S4** TEM images of (a) HNCNFs-600 and (b) HNCNFs-800.



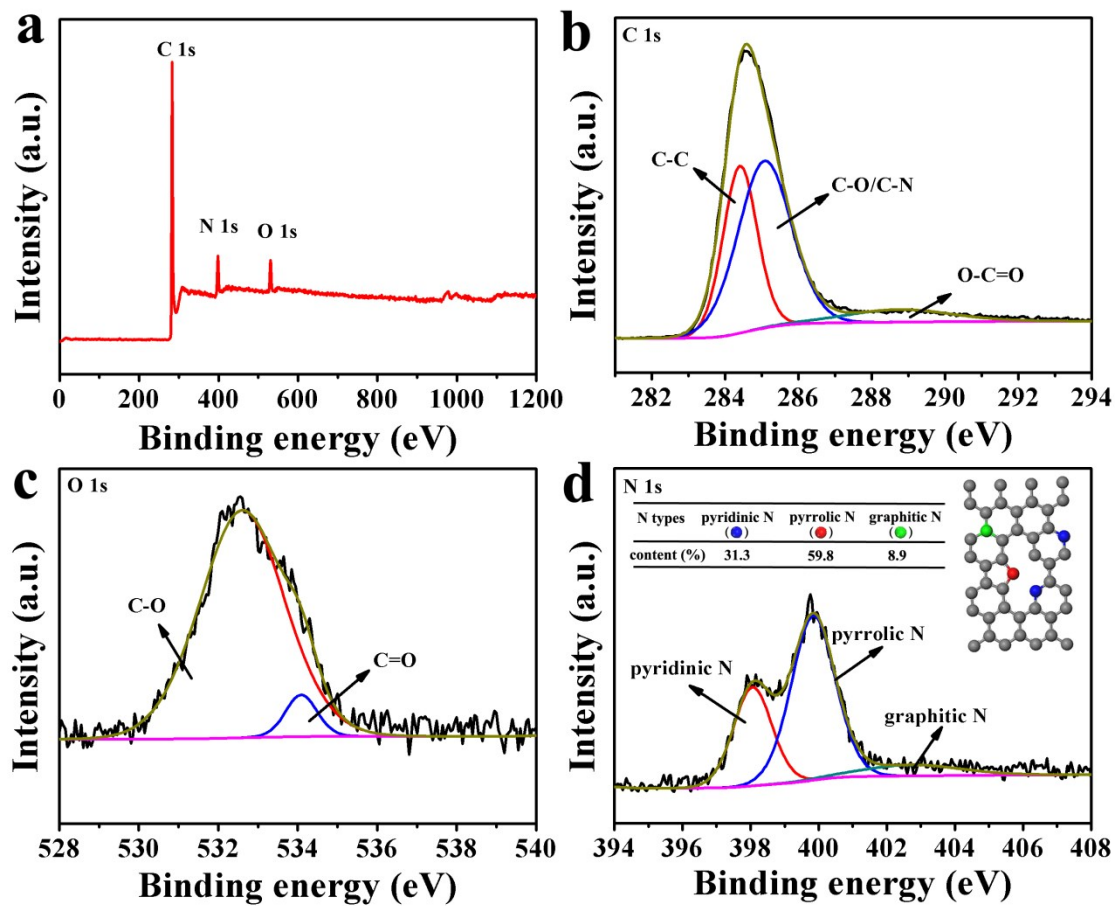

**Fig. S5** (a) XPS survey spectrum of HNCNFs-600. (b), (c) and (d) are high-resolution XPS spectra of C 1s, O 1s and N 1s, respectively.

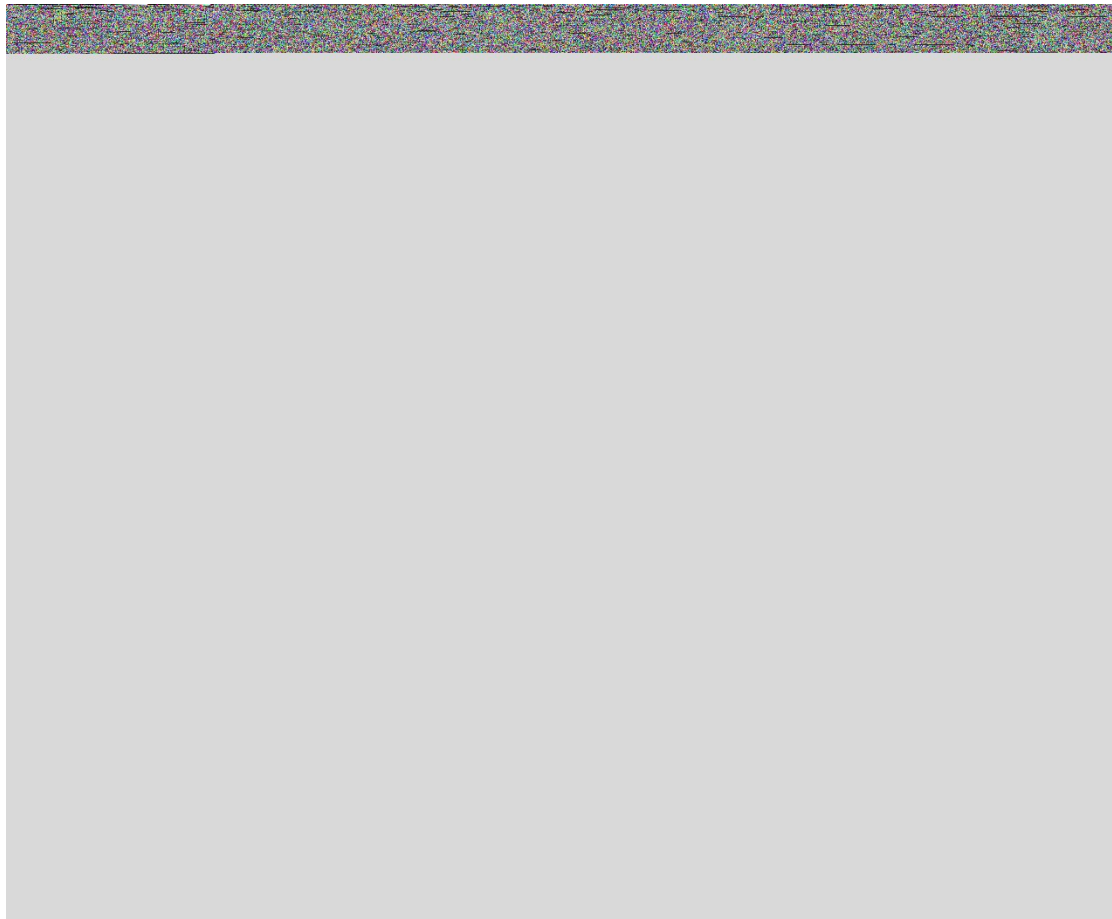

**Fig. S6** (a) XPS survey spectrum of HNCNFs-800. (b), (c) and (d) are high-resolution XPS spectra of C 1s, O 1s and N 1s, respectively.

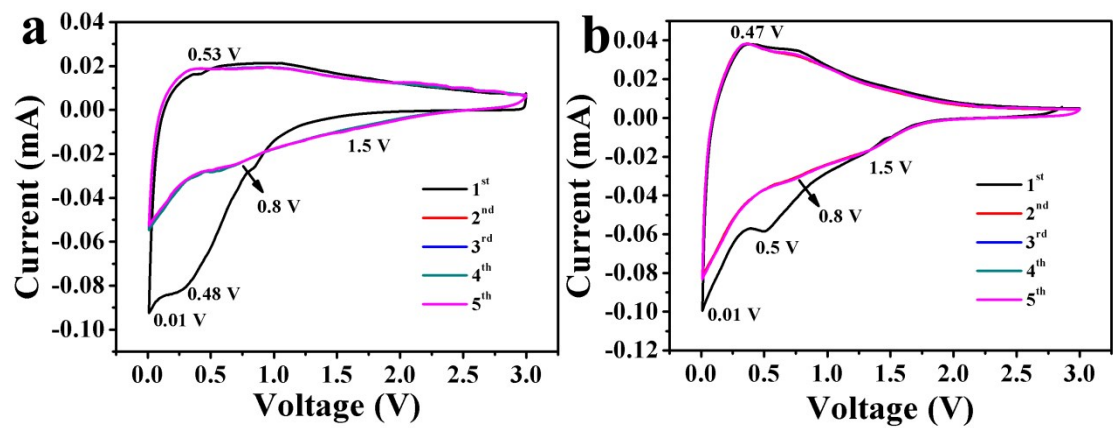

**Fig. S7** CV curves of (a) HNCNFs-600 and (b) HNCNFs-800 electrodes at a scan rate of 0.1 mV s<sup>-1</sup>.

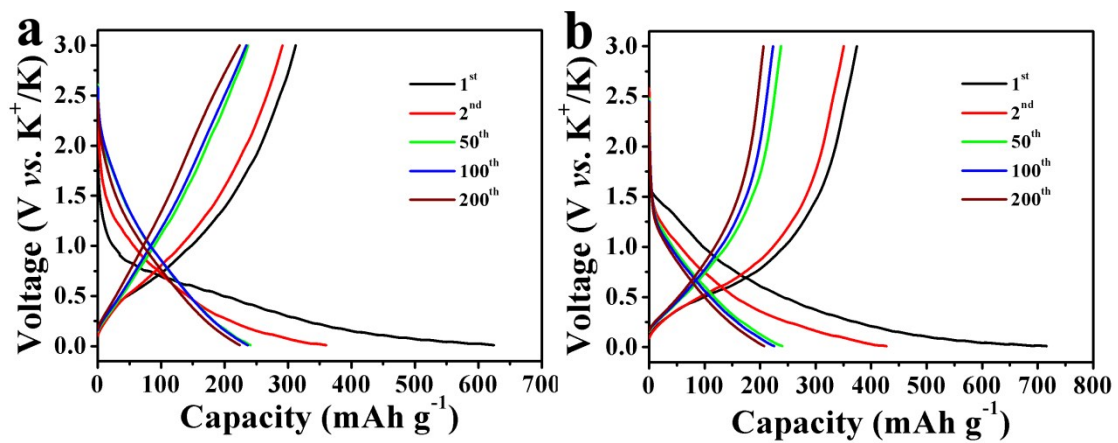

**Fig. S8** Galvanostatic charge/discharge curves of (a) HNCNFs-600 and (b) HNCNFs-800 electrodes for the 1<sup>st</sup>, 2<sup>nd</sup>, 50<sup>th</sup>, 100<sup>th</sup> and 200<sup>th</sup> cycles at a current density of 0.1 A g<sup>-1</sup>.

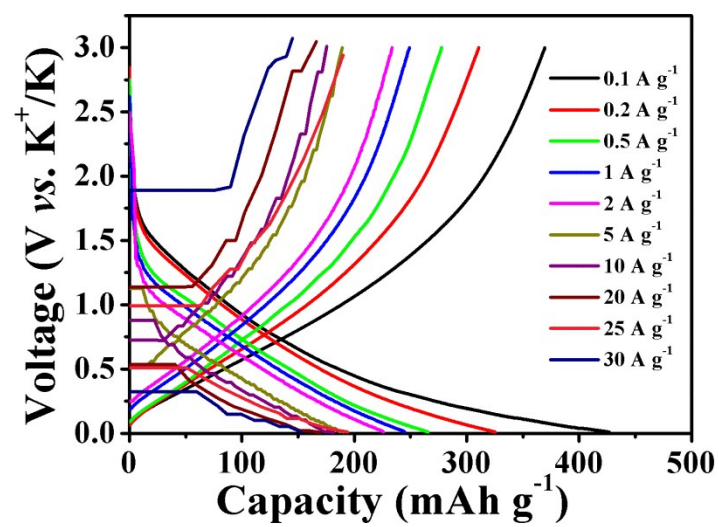

**Fig. S9** Galvanostatic charge/discharge curves of the HNCNFs-700 electrode at various current densities.

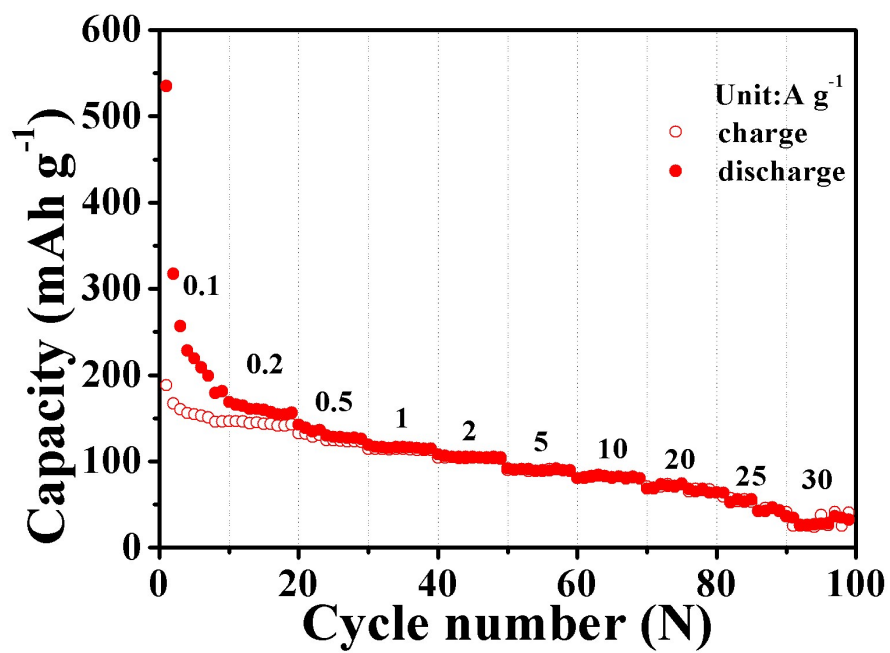

Fig. S10 Rate performance of the super P electrode at various current densities.

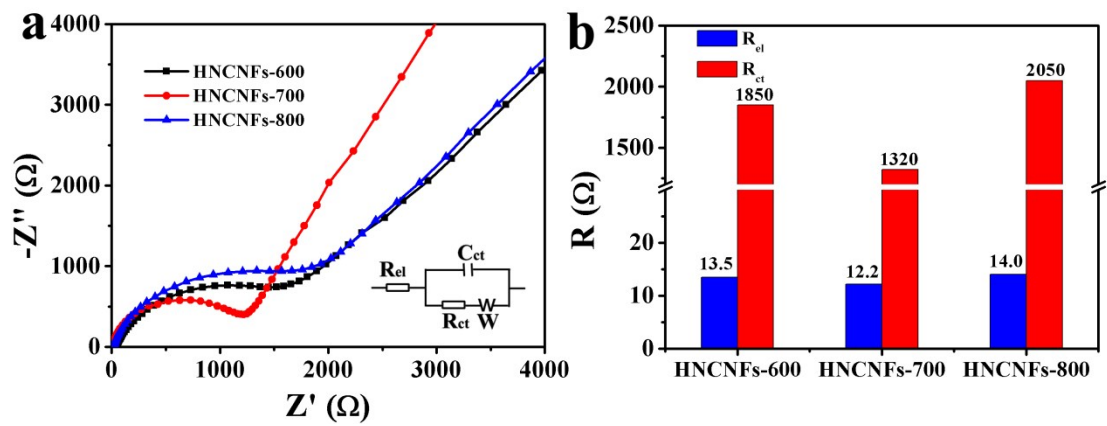

**Fig. S11** (a) EIS of HNCNFs-600, HNCNFs-700 and HNCNFs-800 electrodes in fresh PIBs, where the inset shows the corresponding equivalent circuit diagram. (b) The electrolyte resistance ( $R_{el}$ ) and charge transfer resistance ( $R_{ct}$ ) values of HNCNFs-600, HNCNFs-700 and HNCNFs-800 electrodes.

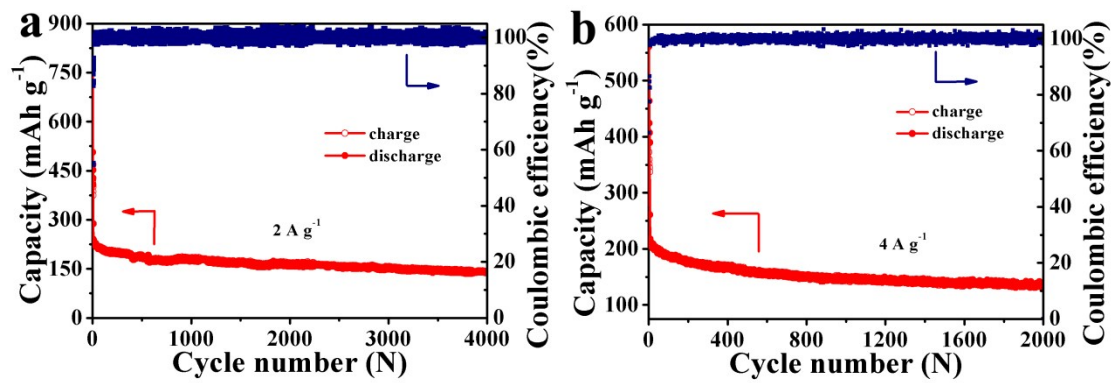

**Fig. S12** Cycling performance of the HNCNFs-700 electrode as well as the coulombic efficiency at (a) 2 A g<sup>-1</sup> for 4000 cycles and (b) 4 A g<sup>-1</sup> for 2000 cycles.



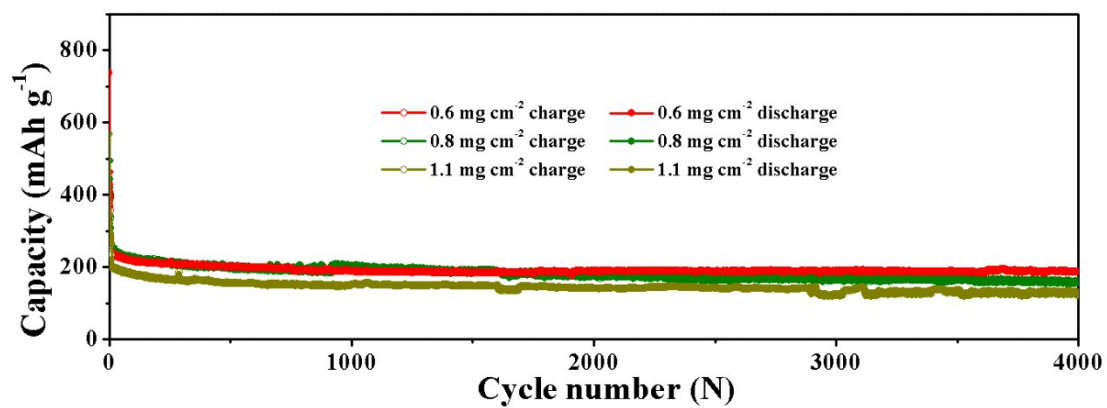

**Fig. S13** Cycling performance of the HNCNFs-700 electrode with different mass loadings at 1 A g<sup>-1</sup> for 4000 cycles.

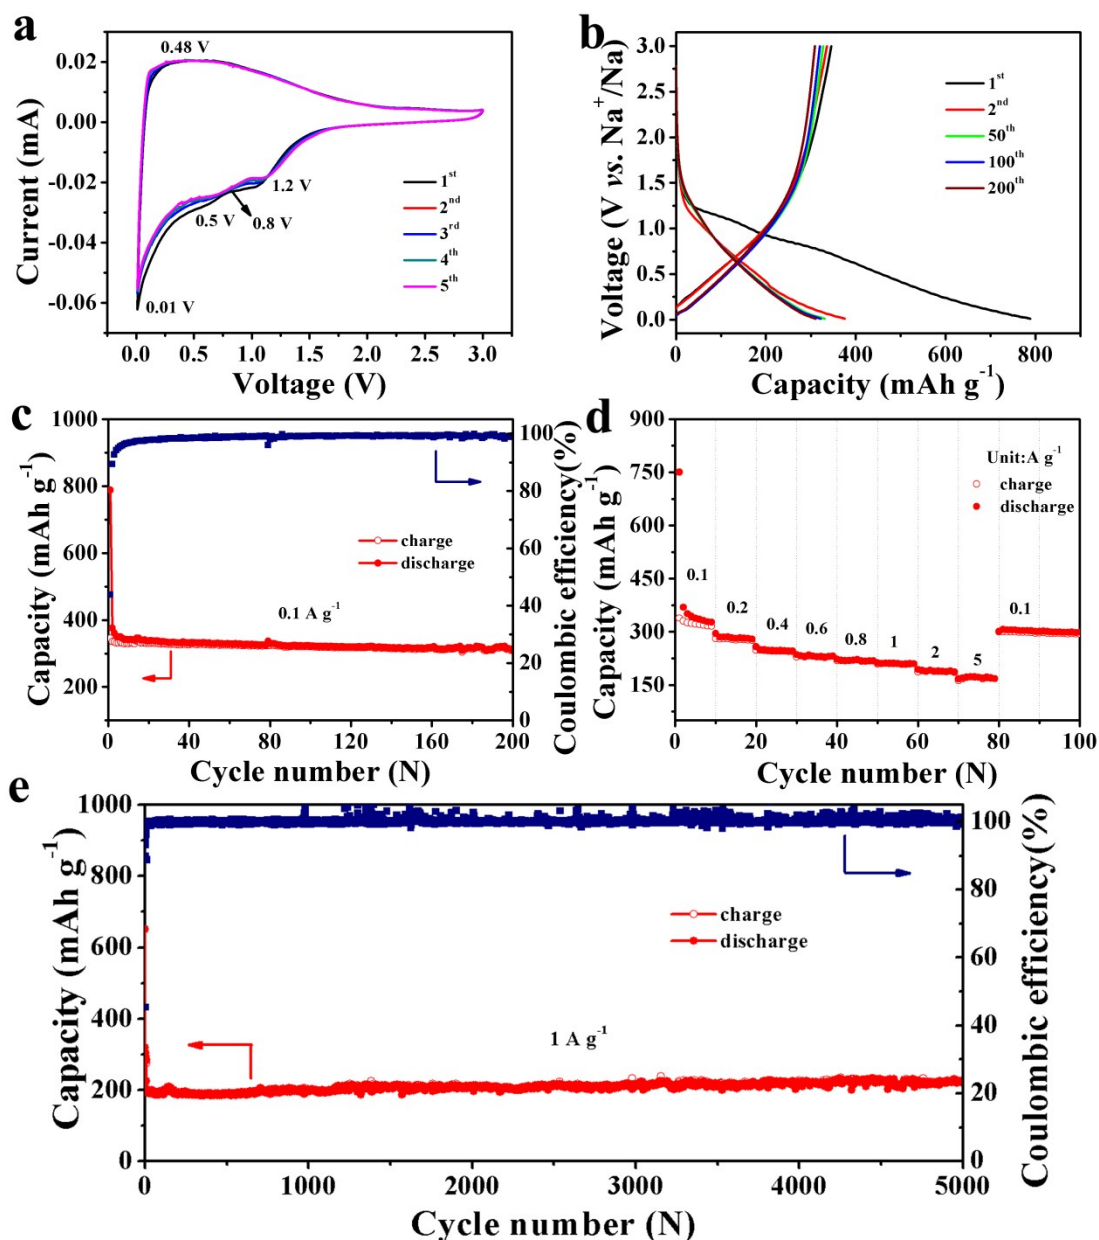

**Fig. S14** Electrochemical performances of the HNCNFs-700 electrode in SIBs. (a) CV curves of the HNCNFs-700 electrode at a scan rate of 0.1 mV s<sup>-1</sup>. (b) Galvanostatic charge/discharge curves of the HNCNFs-700 electrode for the 1<sup>st</sup>, 2<sup>nd</sup>, 50<sup>th</sup>, 100<sup>th</sup> and 200<sup>th</sup> cycles at 0.1 A g<sup>-1</sup>. (c) Cycling performance of the HNCNFs-700 electrode as well as the coulombic efficiency at 0.1 A g<sup>-1</sup>. (d) Rate performance of the HNCNFs-700 electrode at various current densities. (e) Long cycling performance of the HNCNFs-700 electrode as well as the coulombic efficiency at 1 A g<sup>-1</sup>.

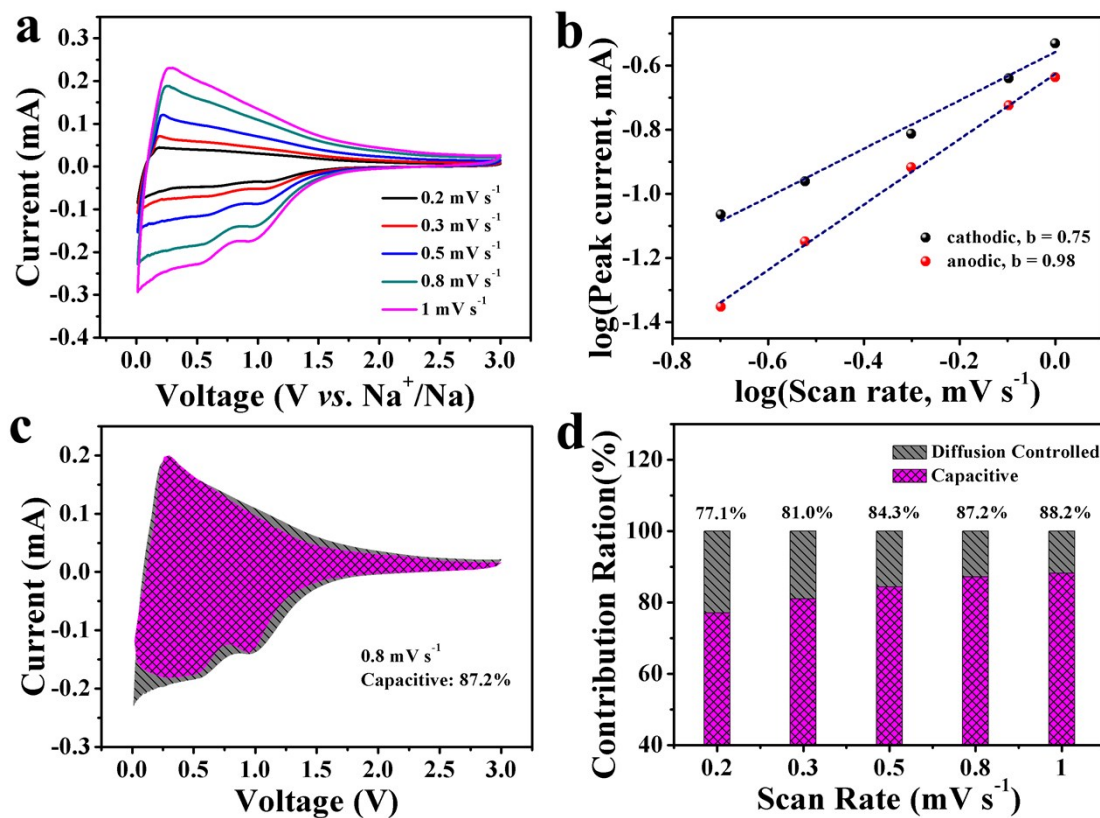

**Fig. S15** Electrochemical kinetics analysis in SIBs. (a) CV curves of the HNCNFs-700 electrode at different scan rates from 0.2 to 1 mV s<sup>-1</sup>. (b) Measurement of  $b$  value with the relationship between  $\log(i)$  and  $\log(v)$ . (c) Capacitive and diffusion-controlled contributions to the charge storage at 0.8 mV s<sup>-1</sup>. (d) Normalized contribution ratios of capacitive and diffusion-controlled capacities of the HNCNFs-700 electrode at different scan rates.

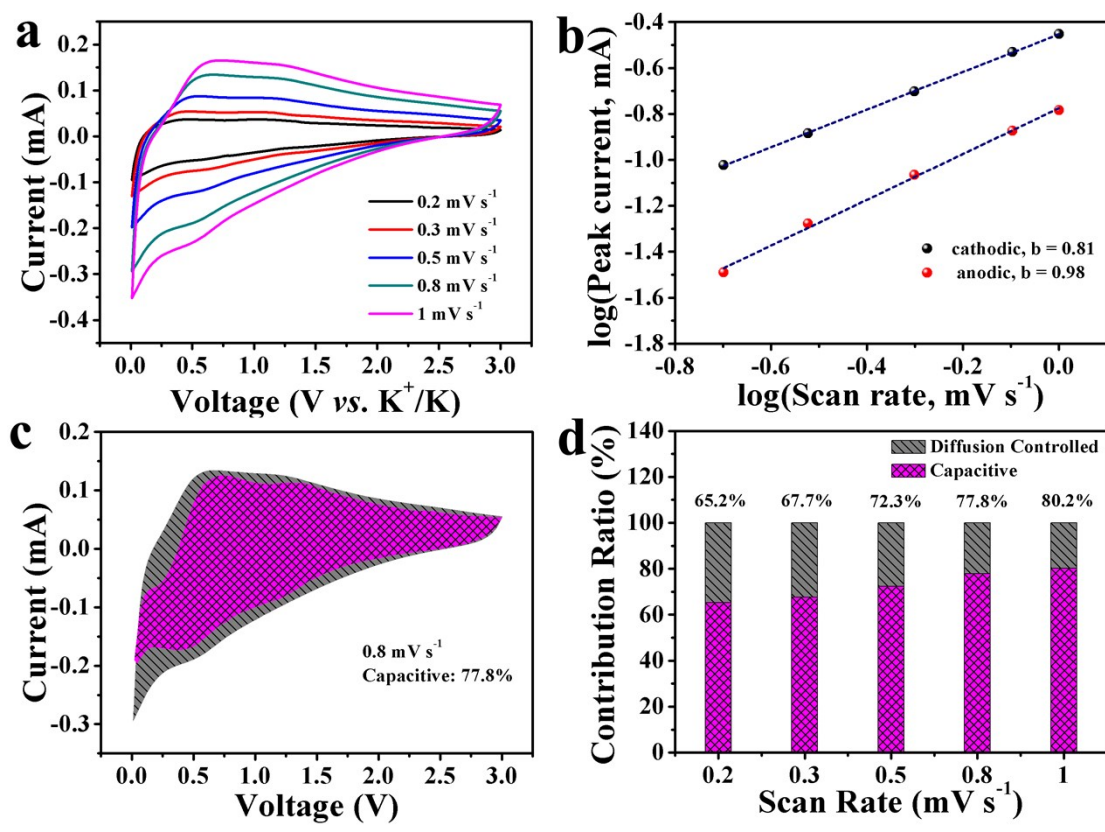

**Fig. S16** Electrochemical kinetics analysis. (a) CV curves of the HNCNFs-600 electrode at different scan rates from 0.2 to 1 mV s<sup>-1</sup>. (b) Measurement of *b* value with the relationship between log(*i*) and log(*v*). (c) Capacitive and diffusion-controlled contributions to the charge storage at 0.8 mV s<sup>-1</sup>. (d) Normalized contribution ratios of capacitive and diffusion-controlled capacities of the HNCNFs-600 electrode at different scan rates.

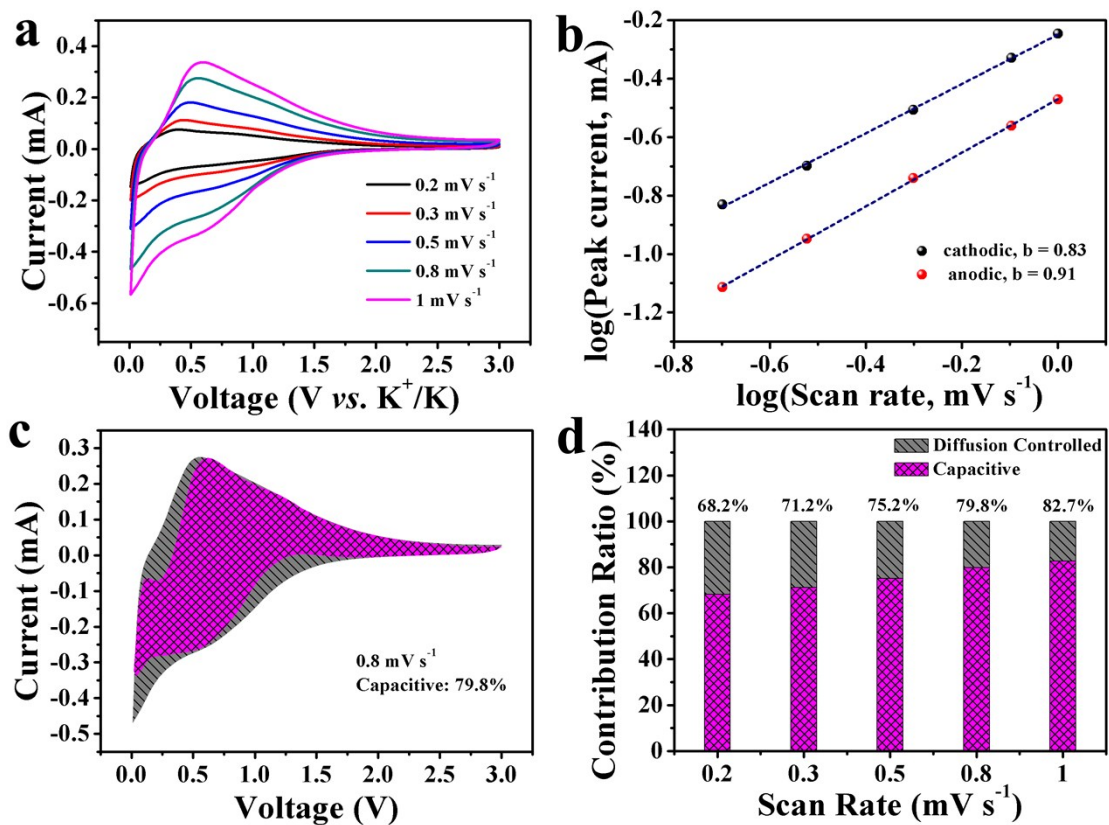

**Fig. S17** Electrochemical kinetics analysis. (a) CV curves of the HNCNFs-800 electrode at different scan rates from 0.2 to 1 mV s<sup>-1</sup>. (b) Measurement of  $b$  value with the relationship between  $\log(i)$  and  $\log(v)$ . (c) Capacitive and diffusion-controlled contributions to the charge storage at 0.8 mV s<sup>-1</sup>. (d) Normalized contribution ratios of capacitive and diffusion-controlled capacities of the HNCNFs-800 electrode at different scan rates.

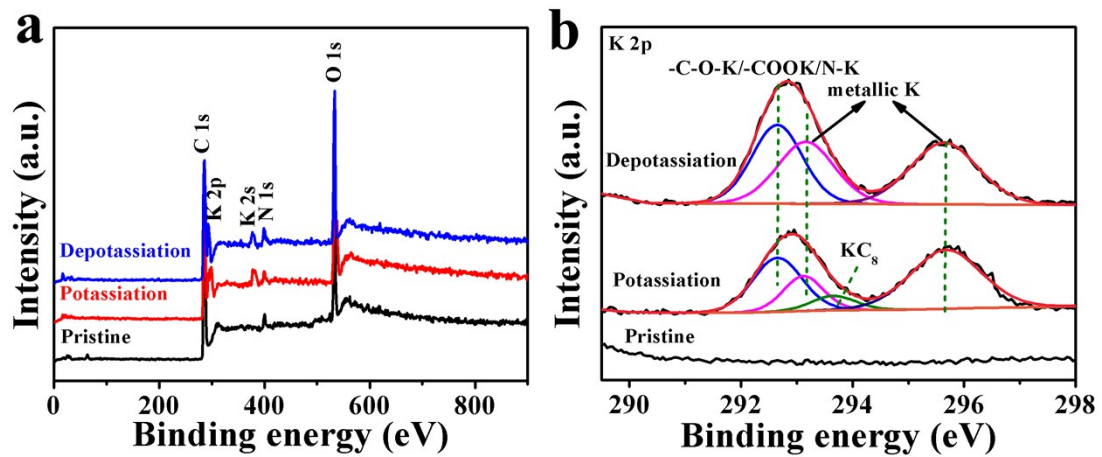

**Fig. S18** *Ex-situ* XPS analysis. (a) XPS survey spectra of the HNCNFs-700 electrode under the pristine, potassiation and depotassiation states. (b) High-resolution XPS spectra of K 2p.

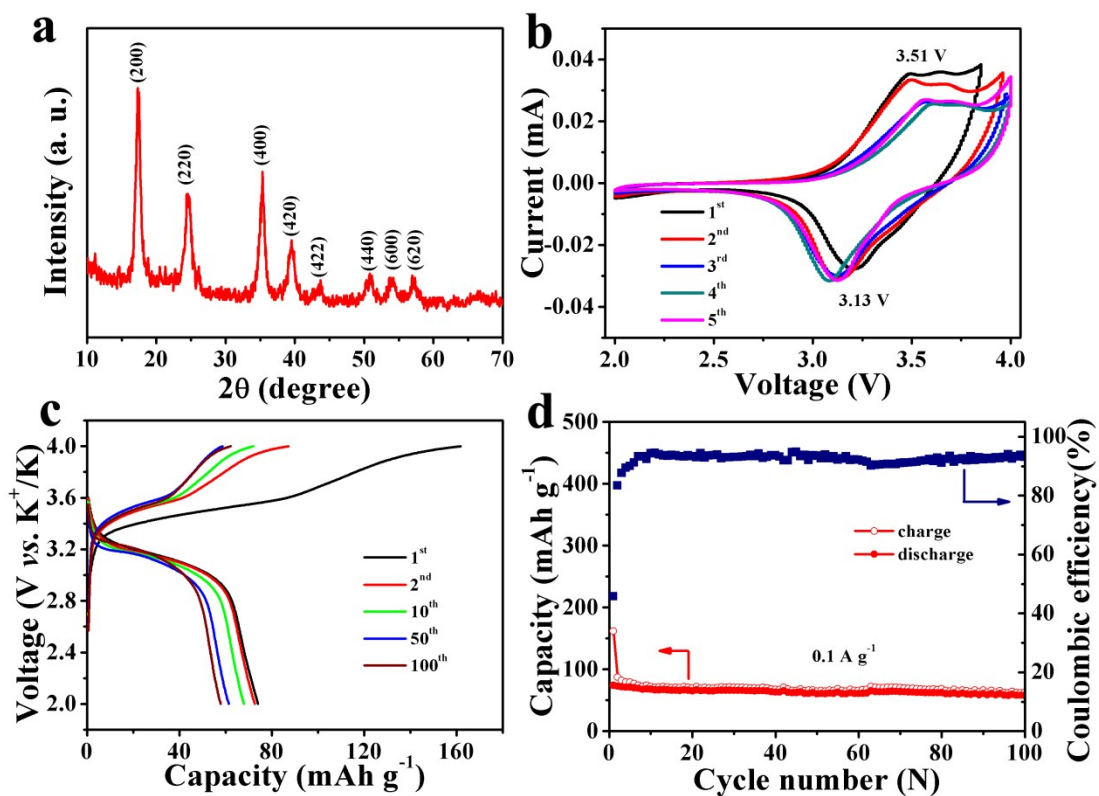

**Fig. S19** Structural characterization and electrochemical performance of KPBNPs in a half cell. (a) XRD pattern. (b) CV curves of the KPBNPs electrode at a scan rate of  $0.1 \text{ mV s}^{-1}$ . (c) Galvanostatic charge/discharge curves of the KPBNPs electrode for the 1<sup>st</sup>, 2<sup>nd</sup>, 10<sup>th</sup>, 50<sup>th</sup> and 100<sup>th</sup> cycles at  $0.1 \text{ A g}^{-1}$ . (d) Cycling performance of the KPBNPs cathode as well as the coulombic efficiency at  $0.1 \text{ A g}^{-1}$ .



## Supplementary Table

**Table S1.** Structure properties and surface chemistry of three different HNCNFs.

| Materials  | $d_{002}$<br>(nm) | $I_D/I_G$ | $S_{BET}$<br>( $m^2 g^{-1}$ ) | C<br>(at.%) | N<br>(at.%) | O (at.<br>%) | % of total N 1s |            |             |
|------------|-------------------|-----------|-------------------------------|-------------|-------------|--------------|-----------------|------------|-------------|
|            |                   |           |                               |             |             |              | pyridinic N     | pyrrolic N | graphitic N |
| HNCNFs-600 | 0.416             | 1.67      | 29.6                          | 84.5        | 10.3        | 5.2          | 31.3            | 59.8       | 8.9         |
| HNCNFs-700 | 0.409             | 1.59      | 34.3                          | 85.2        | 8.2         | 6.6          | 38.1            | 45.7       | 16.2        |
| HNCNFs-800 | 0.401             | 1.42      | 26.1                          | 88.3        | 7.4         | 4.3          | 31.7            | 44.9       | 23.4        |

**Table S2.** Electrochemical properties of three different HNCNFs.

| Materials  | Initial<br>discharge/charge<br>capacity<br>(mAh g <sup>-1</sup> ) | Initial CE<br>(%) | Capacity<br>(mAh g <sup>-1</sup> ) <sup>a</sup> | Rate<br>performance<br>(mAh g <sup>-1</sup> ) <sup>b</sup> | Cycling<br>performance<br>(mAh g <sup>-1</sup> ) <sup>c</sup> | $R_{ct}$<br>( $\Omega$ ) |
|------------|-------------------------------------------------------------------|-------------------|-------------------------------------------------|------------------------------------------------------------|---------------------------------------------------------------|--------------------------|
| HNCNFs-600 | 624.7/312.1                                                       | 49.9              | 223.2                                           | 121.6                                                      | 60.5                                                          | 1850                     |
| HNCNFs-700 | 781.9/410.6                                                       | 52.5              | 274.5                                           | 139.7                                                      | 188.4                                                         | 1320                     |
| HNCNFs-800 | 715.6/374.2                                                       | 52.3              | 206.4                                           | 70.3                                                       | 89.5                                                          | 2050                     |

<sup>a</sup> Discharge capacities of the HNCNFs electrodes at 0.1 A g<sup>-1</sup> after 200 cycles.

<sup>b</sup> Discharge capacities of the HNCNFs electrodes at 30 A g<sup>-1</sup>.

<sup>c</sup> Discharge capacities of the HNCNFs electrodes after 4000 cycles at 1 A g<sup>-1</sup>.



**Table S3.** Comparisons of electrochemical properties of some carbon-based electrode materials in PIBs reported in open literatures.

| Materials                                      | Initial CE | Rate performance                                                                                                                                                                                                                                                    | Cycling performance                                                                                                                                                                                                                                               | Reference             |
|------------------------------------------------|------------|---------------------------------------------------------------------------------------------------------------------------------------------------------------------------------------------------------------------------------------------------------------------|-------------------------------------------------------------------------------------------------------------------------------------------------------------------------------------------------------------------------------------------------------------------|-----------------------|
| HNCNFs-700                                     | 52.5%      | 239.6 mAh g <sup>-1</sup> (2 A g <sup>-1</sup> )<br>211.0 mAh g <sup>-1</sup> (5 A g <sup>-1</sup> )<br>190.2 mAh g <sup>-1</sup> (10 A g <sup>-1</sup> )<br>161.7 mAh g <sup>-1</sup> (20 A g <sup>-1</sup> )<br>139.7 mAh g <sup>-1</sup> (30 A g <sup>-1</sup> ) | 274.5 mAh g <sup>-1</sup> (200 cycles, 0.1 A g <sup>-1</sup> )<br>188.4 mAh g <sup>-1</sup> (4000 cycles, 1 A g <sup>-1</sup> )<br>141.7 mAh g <sup>-1</sup> (4000 cycles, 2 A g <sup>-1</sup> )<br>132.5 mAh g <sup>-1</sup> (2000 cycles, 4 A g <sup>-1</sup> ) | This work             |
| Necklace-like N-doped hollow carbon            | ~30%       | 224.3 mAh g <sup>-1</sup> (1 A g <sup>-1</sup> )<br>204.8 mAh g <sup>-1</sup> (2 A g <sup>-1</sup> )                                                                                                                                                                | 293.5 mAh g <sup>-1</sup> (400 cycles, 0.2 A g <sup>-1</sup> )<br>161.3 mAh g <sup>-1</sup> (1600 cycles, 1 A g <sup>-1</sup> )                                                                                                                                   | Ref. [18] of the text |
| 3D N-doped framework carbon                    | 24.3%      | 168 mAh g <sup>-1</sup> (1 A g <sup>-1</sup> )<br>146 mAh g <sup>-1</sup> (2 A g <sup>-1</sup> )<br>115 mAh g <sup>-1</sup> (5 A g <sup>-1</sup> )<br>111 mAh g <sup>-1</sup> (10 A g <sup>-1</sup> )                                                               | 137 mAh g <sup>-1</sup> (1000 cycles, 2 A g <sup>-1</sup> )                                                                                                                                                                                                       | [1]                   |
| N/O dual-doped carbon network                  | 47.12%     | 205 mAh g <sup>-1</sup> (1 A g <sup>-1</sup> )<br>181 mAh g <sup>-1</sup> (2 A g <sup>-1</sup> )<br>175 mAh g <sup>-1</sup> (5 A g <sup>-1</sup> )                                                                                                                  | 260 mAh g <sup>-1</sup> (100 cycles, 0.1 A g <sup>-1</sup> )<br>160 mAh g <sup>-1</sup> (4000 cycles, 1 A g <sup>-1</sup> )                                                                                                                                       | Ref. [39] of the text |
| N-doped porous carbon                          | 48.9%      | 185 mAh g <sup>-1</sup> (10 A g <sup>-1</sup> )                                                                                                                                                                                                                     | 384 mAh g <sup>-1</sup> (500 cycles, 0.1 A g <sup>-1</sup> )<br>226.1 mAh g <sup>-1</sup> (1000 cycles, 1 A g <sup>-1</sup> )<br>194 mAh g <sup>-1</sup> (1000 cycles, 2 A g <sup>-1</sup> )<br>160.5 mAh g <sup>-1</sup> (1000 cycles, 5 A g <sup>-1</sup> )     | Ref. [30] of the text |
| Highly N-doped carbon fibers                   | 49%        | 153 mAh g <sup>-1</sup> (2 A g <sup>-1</sup> )<br>126 mAh g <sup>-1</sup> (5 A g <sup>-1</sup> )<br>104 mAh g <sup>-1</sup> (10 A g <sup>-1</sup> )<br>101 mAh g <sup>-1</sup> (20 A g <sup>-1</sup> )                                                              | 248 mAh g <sup>-1</sup> (100 cycles, 0.05 A g <sup>-1</sup> )<br>164 mAh g <sup>-1</sup> (2000 cycles, 1 A g <sup>-1</sup> )<br>146 mAh g <sup>-1</sup> (4000 cycles, 2 A g <sup>-1</sup> )                                                                       | Ref. [19] of the text |
| N/O dual-doped hierarchical porous hard carbon | 25%        | 118 mAh g <sup>-1</sup> (3 A g <sup>-1</sup> )                                                                                                                                                                                                                      | 230.6 mAh g <sup>-1</sup> (100 cycles, 0.05 A g <sup>-1</sup> )<br>130 mAh g <sup>-1</sup> (1100 cycles, 1050 mA g <sup>-1</sup> )                                                                                                                                | Ref. [29] of the text |
| Amorphous ordered mesoporous carbon            | 63.6%      | 144 mAh g <sup>-1</sup> (1 A g <sup>-1</sup> )                                                                                                                                                                                                                      | 257.4 mAh g <sup>-1</sup> (100 cycles, 0.05 A g <sup>-1</sup> )<br>146.5 mAh g <sup>-1</sup> (1000 cycles, 1 A g <sup>-1</sup> )                                                                                                                                  | Ref. [4] of the text  |
| Ultra-high pyridinic N-doped porous carbon     | 20%        | 178 mAh g <sup>-1</sup> (5 A g <sup>-1</sup> )                                                                                                                                                                                                                      | 260 mAh g <sup>-1</sup> (120 cycles, 0.05 A g <sup>-1</sup> )<br>152 mAh g <sup>-1</sup> (3000 cycles, 1 A g <sup>-1</sup> )                                                                                                                                      | [2]                   |
| Free-standing porous carbon nanofibers paper   | 24.1%      | 190 mAh g <sup>-1</sup> (2 A g <sup>-1</sup> )<br>140 mAh g <sup>-1</sup> (5 A g <sup>-1</sup> )<br>100 mAh g <sup>-1</sup> (7.7 A g <sup>-1</sup> )                                                                                                                | 270 mAh g <sup>-1</sup> (80 cycles, 0.02 A g <sup>-1</sup> )<br>211 mAh g <sup>-1</sup> (1200 cycles, 0.2 A g <sup>-1</sup> )                                                                                                                                     | Ref. [13] of the text |

**Table S4.** The mass loadings of some carbon-based anodes in PIBs reported in open literatures.

| Active materials                                      | Mass loading (mg cm <sup>-2</sup> ) | Cycling performance                                               | Reference             |
|-------------------------------------------------------|-------------------------------------|-------------------------------------------------------------------|-----------------------|
| HNCNFs-700                                            | 0.6                                 | 188.4 mAh g <sup>-1</sup><br>(1 A g <sup>-1</sup> , 4000 cycles)  | This work             |
|                                                       |                                     | 141.7 mAh g <sup>-1</sup><br>(2 A g <sup>-1</sup> , 4000 cycles)  |                       |
|                                                       |                                     | 132.5 mAh g <sup>-1</sup><br>(4 A g <sup>-1</sup> , 4000 cycles)  |                       |
| HNCNFs-700                                            | 0.8                                 | 161.2 mAh g <sup>-1</sup><br>(1 A g <sup>-1</sup> , 4000 cycles)  | This work             |
| HNCNFs-700                                            | 1.1                                 | 130.4 mAh g <sup>-1</sup><br>(1 A g <sup>-1</sup> , 4000 cycles)  | This work             |
| N-doped soft carbon frameworks                        | 1.0                                 | 165 mAh g <sup>-1</sup><br>(1 A g <sup>-1</sup> , 500 cycles)     | [3]                   |
| N/O dual-doped carbon network                         | 0.8                                 | 160 mAh g <sup>-1</sup><br>(1 A g <sup>-1</sup> , 4000 cycles)    | Ref. [44] of the text |
| N-doped carbon nanotubes                              | 1.2                                 | 60 mAh g <sup>-1</sup><br>(2 A g <sup>-1</sup> , 1000 cycles)     | [4]                   |
| N-doped framework carbon                              | 0.7-1.0                             | 137 mAh g <sup>-1</sup><br>(2 A g <sup>-1</sup> , 1000 cycles)    | [5]                   |
| soft Carbon                                           | 1.0-1.5                             | 200 mAh g <sup>-1</sup><br>(20 mA g <sup>-1</sup> , 100 cycles)   | [6]                   |
| N/S codoped carbon microboxes                         | 1.2                                 | 180 mAh g <sup>-1</sup><br>(0.5 A g <sup>-1</sup> , 1000 cycles)  | Ref. [1] of the text  |
| porous thin carbon shells                             | 1.0-1.2                             | 65 mAh g <sup>-1</sup><br>(2 A g <sup>-1</sup> , 900 cycles)      | [7]                   |
| graphite foam                                         | 1.9                                 | 200 mAh g <sup>-1</sup><br>(40 mA g <sup>-1</sup> , 200 cycles)   | [8]                   |
| carbon nanotubes-interweaved layer on graphite flakes | 0.8                                 | 234.4 m Ah g <sup>-1</sup><br>(2 A g <sup>-1</sup> , 1500 cycles) | [9]                   |
| N/S co-doped porous carbon                            | 1.2                                 | 125 mAh g <sup>-1</sup><br>(1 A g <sup>-1</sup> , 1000 cycles)    | [10]                  |
| N-doped porous carbon                                 | 0.64                                | 226.1 mAh g <sup>-1</sup><br>(1 A g <sup>-1</sup> , 1000 cycles)  | Ref. [30] of the text |
| N-doped bamboo-like carbon nanotubes                  | 0.5                                 | 204 mAh g <sup>-1</sup><br>(0.5 A g <sup>-1</sup> , 1000 cycles)  | [11]                  |
| hollow carbon nanospheres                             | 0.2                                 | 144.3 mAh g <sup>-1</sup><br>(4 A g <sup>-1</sup> , 2000 cycles)  | Ref. [11] of the text |

|                                            |           |                                                                    |                       |
|--------------------------------------------|-----------|--------------------------------------------------------------------|-----------------------|
| graphitic carbon nanocage                  | 0.8-1.0   | 248 mAh g <sup>-1</sup><br>(55 mA g <sup>-1</sup> , 100 cycles)    | Ref. [49] of the text |
| N-doped carbon nanotubes                   | 0.7       | 102 mAh g <sup>-1</sup><br>(2 A g <sup>-1</sup> , 500 cycles)      | [12]                  |
| few layer N-doped graphene                 | 0.63-0.75 | 150 mAh g <sup>-1</sup><br>(0.5 A g <sup>-1</sup> , 500 cycles)    | [13]                  |
| high pyridine N-doped porous carbon        | 0.8       | 231 mAh g <sup>-1</sup><br>(0.5 A g <sup>-1</sup> , 2000 cycles)   | Ref. [15] of the text |
| amorphous ordered mesoporous carbon        | 1.0       | 146 mAh g <sup>-1</sup><br>(1 A g <sup>-1</sup> , 1000 cycles)     | Ref. [4] of the text  |
| highly N-doped carbon nanofibers           | 1.5       | 164 mAh g <sup>-1</sup><br>(1 A g <sup>-1</sup> , 2000 cycles)     | Ref. [19] of the text |
| N-doped carbon nanofibers                  | 0.9-1.3   | 103.4 mAh g <sup>-1</sup><br>(0.5 A g <sup>-1</sup> , 1000 cycles) | Ref. [41] of the text |
| expanded graphite                          | 2.0       | 174 mAh g <sup>-1</sup><br>(0.2 A g <sup>-1</sup> , 500 cycles)    | Ref. [43] of the text |
| highly disordered hard carbon              | 1.0       | 240 mAh g <sup>-1</sup><br>(0.2 A g <sup>-1</sup> , 150 cycles)    | [14]                  |
| 3D rGO aerogel                             | 0.7-1.0   | 137 mAh g <sup>-1</sup><br>(2 A g <sup>-1</sup> , 1000 cycles)     | [15]                  |
| N/O dual-doped hard carbon                 | 0.9       | 130 mAh g <sup>-1</sup><br>(1050 mA g <sup>-1</sup> , 1100 cycles) | Ref. [29] of the text |
| hard-soft composite carbon                 | 2.0       | 200 mAh g <sup>-1</sup><br>(0.2 A g <sup>-1</sup> , 200 cycles)    | [16]                  |
| ultra-high pyridinic N-doped porous carbon | 1.0       | 152 mAh <sup>-1</sup><br>(1 A g <sup>-1</sup> , 3000 cycles)       | [2]                   |
| few-layer F-doped graphene foam            | 0.52-0.58 | 165.9 mAh g <sup>-1</sup><br>(0.5 A g <sup>-1</sup> , 200 cycles)  | [17]                  |

**Table S5.** Energy density ( $E$ ) of carbon-based potassium-ion full cells reported in open literatures.

| Materials                                                                              | $E$ (Wh kg <sup>-1</sup> ) | Reference             |
|----------------------------------------------------------------------------------------|----------------------------|-----------------------|
| HNCNFs-700//KPBNPs                                                                     | 70.3                       | This work             |
| carbon foam//carbon foam                                                               | 58                         | [18]                  |
| N-doped carbon nanotubes//laser scribed graphene                                       | 65                         | [4]                   |
| activated carbon//K <sub>2</sub> TP                                                    | 101                        | [19]                  |
| onion-like carbon//activated carbon                                                    | 142                        | [20]                  |
| N, P-codoped graphene grown on carbon cloth//KPB                                       | 231.5                      | [21]                  |
| graphenic carbon//K <sub>2</sub> Ti <sub>6</sub> O <sub>13</sub>                       | 58.2                       | [22]                  |
| activated carbon//Ca <sub>0.5</sub> Ti <sub>2</sub> (PO <sub>4</sub> ) <sub>3</sub> @C | 80                         | [23]                  |
| graphite//prussian blue                                                                | 110                        | Ref. [55] of the text |
| soft carbon//commercialized activated carbon                                           | 120                        | [24]                  |
| N-doped porous carbon//PTCDA                                                           | 153                        | [2]                   |

## References

- 1 B. J. Yang, J. T. Chen, L. Y. Liu, P. J. Ma, B. Liu, J. W. Lang, Y. Tang and X. B. Yan, *Energy Storage Mater.*, 2019, **23**, 522-529.
- 2 Y. H. Xie, Y. Chen, L. Liu, P. Tao, M. P. Fan, N. Xu, X. W. Shen and C. L. Yan, *Adv. Mater.*, 2017, **29**, 1702268.
- 3 C. Liu, N. Xiao, H. J. Li, Q. Dong, Y. W. Wang, H. Q. Li, S. F. Wang, X. Y. Zhang and J. S. Qiu, *Chem. Eng. J.*, 2020, **382**, 121759.
- 4 M. Moussa, S. A. Al-Bataineh, D. Losic and D. P. Dubal, *Appl. Mater. Today*, 2019, **16**, 425-434.
- 5 B. J. Yang, J. T. Chen, L. Y. Liu, P. J. Ma, B. Liu, J. W. Lang, Y. Tang and X. B. Yan, *Energy Storage Mater.*, 2019, **23**, 522-529.
- 6 Z. F. Li, W. Shin, Y. C. Chen, J. C. Neuefeind, P. A. Greaney and X. L. Ji, *ACS Appl. Energy Mater.*, 2019, **2**, 4053-4058.
- 7 A. Mahmood, S. Li, Z. Ali, H. Tabassum, B. J. Zhu, Z. B. Liang, W. Meng, W. Aftab, W. H. Guo, H. Zhang, M. Yousaf, S. Gao, R. Q. Zou and Y. Y. Zhao, *Adv. Mater.*, 2019, **31**, 1805430.
- 8 H. H. Wang, G. Yang, Z. Chen, J. L. Liu, X. F. Fan, P. Liang, Y. Z. Huang, J. Y. Lin and Z. X. Shen, *J. Power Sources*, 2019, **419**, 82-90.
- 9 S. Jiang, Y. Li, Y. Qian, J. Zhou, T. Q. Li, N. Lin and Y. T. Qian, *J. Power Sources*, 2019, **436**, 226847.
- 10 L. F. Wang, S. J. Li, J. L. Li, S. Yan, X. Y. Zhang, D. H. Wei, Z. Xing, Q. C. Zhuang and Z. C. Ju, *Mater. Today Energy*, 2019, **13**, 195-204.

- 11 Y. Z. Liu, C. H. Yang, Q. C. Pan, Y. P. Li, G. Wang, X. Ou, F. H. Zheng, X. H. Xiong, M. L. Liu and Q. Y. Zhang, *J. Mater. Chem. A*, 2018, **6**, 15162-15169.
- 12 P. X. Xiong, X. X. Zhao and Y. H. Xu, *ChemSusChem*, 2018, **11**, 202-208.
- 13 Z. C. Ju, P. Z. Li, G. Y. Ma, Z. Xing, Q. C. Zhuang and Y. T. Qian, *Energy Storage Mater.*, 2018, **11**, 38-46.
- 14 X. D. He, J. Y. Liao, Z. F. Tang, L. N. Xiao, X. Ding, Q. Hu, Z. Y. Wen and C. H. Chen, *J. Power Sources*, 2018, **396**, 533-541.
- 15 L. Y. Liu, Z. F. Lin, J.-Y. Chane-Ching, H. Shao, P.-L. Taberna and P. Simon, *Energy Storage Mater.*, 2019, **19**, 306-313.
- 16 Z. L. Jian, S. Hwang, Z. F. Li, A. S. Hernandez, X. F. Wang, Z. Y. Xing, D. Su and X. L. Ji, *Adv. Funct. Mater.*, 2017, **27**, 1700324.
- 17 Z. C. Ju, S. Zhang, Z. Xing, Q. C. Zhuang, Y. H. Qiang and Y. T. Qian, *ACS Appl. Mater. Interfaces*, 2016, **8**, 20682-20690.
- 18 Y. H. Feng, S. H. Chen, J. Wang and B. G. Lu, *J. Energy Chem.*, 2020, **43**, 129-138.
- 19 Y. W. Luo, L. J. Liu, K. X. Lei, J. F. Shi, G. Xu, F. J. Li and J. Chen, *Chem. Sci.*, 2019, **10**, 2048-2052.
- 20 J. T. Chen, B. J. Yang, H. X. Li, P. J. Ma, J. W. Lang and X. B. Yan, *J. Mater. Chem. A*, 2019, **7**, 9247-9252.
- 21 W. D. Qiu, H. B. Xiao, Y. Li, X. H. Lu and Y. X. Tong, *Small*, 2019, **15**, 1901285.
- 22 S. Y. Dong, Z. F. Li, Z. Y. Xing, X. Y. Wu, X. L. Ji and X. G. Zhang, *ACS Appl.*

*Mater. Interfaces*, 2018, **10**, 15542-15547.

23 Z. Y. Zhang, M. L. Li, Y. Gao, Z. X. Wei, M. N. Zhang, C. Z. Wang, Y. Zeng, B.

Zou, G. Chen and F. Du, *Adv. Funct. Mater.*, 2018, **28**, 1802684.

24 L. Fan, K. Lin, J. Wang, R. Ma and B. Lu, *Adv. Mater.*, 2018, **30**, 1800804.
